# Supplementary material
Source: HighWire-hosted journal article supplement (https://jpet.aspetjournals.org/content/suppl/2018/11/05/jpet.118.250225)
Supplement: 250225SupplDataREVISED.pdf [file 250225SupplDataREVISED.pdf]

**Suppression of canine ABCB1 in MDCKII cells unmasks human ABCG2-mediated efflux of olaparib** **JPET#250225**

Yoo-Kyung Song, Ji Eun Park, Yunseok Oh, Sungwoo Hyung, Yoo-Seong Jeong, Min-Soo Kim, Woojin Lee and Suk-Jae Chung : Journal of Pharmacology and Experimental Therapeutics

**Sensitivity analysis on transport inhibition of arbitrary substrates**

In order to determine whether the inhibition of verapamil toward cABCB1 is applicable to an arbitrary substrate with varying  $K_m$  values, sensitivity analysis was carried out. The transport velocity of a substrate in the presence of an inhibitor is as shown in Eq. 1. In addition,  $IC_{50}$  could be described as Eq. 2 (i.e., rearrangement of Cheng-Prusoff equation), and assuming that active transport is predominant (i.e.,  $V_0/V_{max} = 0$ ), Eq. 1 could be rearranged as Eq 3 and 4:

$$V = V_{max} - (V_{max} - V_0) \cdot \left[ \frac{[I]}{[I] + IC_{50}} \right] \quad (1)$$

$$IC_{50} = K_i \cdot \left( 1 + \frac{[S]}{K_m} \right) \quad (2)$$

$$V = V_{max} - (V_{max} - V_0) \cdot \frac{[I]}{[I] + K_i \left( 1 + \frac{[S]}{K_m} \right)} \quad (3)$$

$$\frac{V}{V_{max}} = 1 - \frac{[I]}{[I] + K_i \left( 1 + \frac{[S]}{K_m} \right)} \quad (4)$$

where  $K_i$ ,  $K_m$  and  $[S]$  represent the inhibition coefficient of the inhibitor, the Michaelis-Menten constant and concentration of the substrate, respectively. By using Berkeley Madonna<sup>TM</sup> software (version 8.3.18; University of California, Berkeley, CA, USA), % inhibition of the transport was then simulated using the equation below (Eq. 5):

$$\% \text{ inhibition} = 100 \times \left( 1 - \frac{V}{V_{max}} \right) \quad (5)$$

**Suppression of canine ABCB1 in MDCKII cells unmasks human ABCG2-mediated efflux of olaparib**

**JPET#250225**

Yoo-Kyung Song, Ji Eun Park, Yunseok Oh, Sungwoo Hyung, Yoo-Seong Jeong, Min-Soo Kim, Woojin Lee and Suk-Jae Chung : Journal of Pharmacology and Experimental Therapeutics

**Inhibition of olaparib efflux using other ABCG2 inhibitors**

To further determine hABCG2-mediated transport of olaparib, transcellular transport of olaparib was also studied in the presence of hABCG2 inhibitors other than Ko143 (i.e., elacridar or fumitremorgin C). The transcellular transport of 10  $\mu$ M olaparib was determined in verapamil-treated or shRNA-transfected MDCKII/WT and MDCKII/hABCG2 cells, and 1  $\mu$ M Ko143, 10  $\mu$ M elacridar or 10  $\mu$ M fumitremorgin C was added for inhibition of the transport. The transport was studied for a period of 120 min at 37°C, and concentrations of olaparib were determined by chromatographic quantification at the end of the incubation.

**Suppression of canine ABCB1 in MDCKII cells unmasks human ABCG2-mediated efflux of olaparib** **JPET#250225**

Yoo-Kyung Song, Ji Eun Park, Yunseok Oh, Sungwoo Hyung, Yoo-Seong Jeong, Min-Soo Kim, Woojin Lee and Suk-Jae Chung : Journal of Pharmacology and Experimental Therapeutics

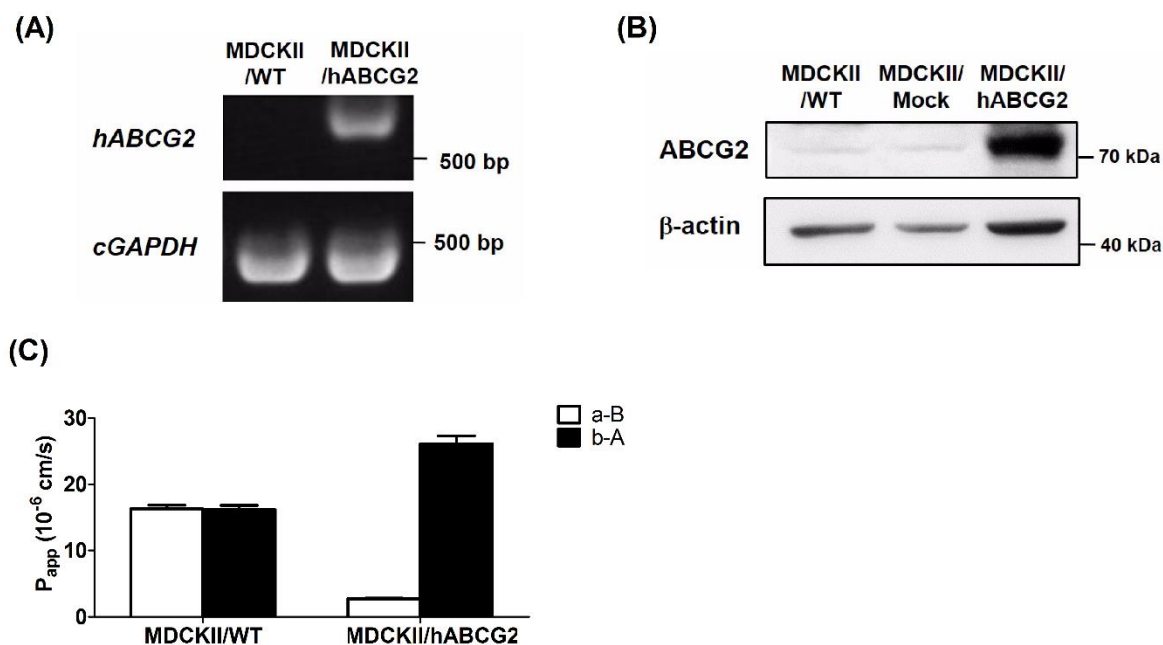

Figure S1. (A) Agarose gel electrophoresis of PCR products using the total RNA extract from MDCKII/WT and MDCKII/hABCG2 cells. PCR products were generated by *hABCG2* (product size: 577 bp) and *cGAPDH* (product size: 497 bp) primer, respectively. (B) Western blot analysis from cell lysates (60  $\mu$ g) of MDCKII/WT, MDCKII/Mock and MDCKII/hABCG2, probed with anti-ABCG2 and anti- $\beta$ -actin antibodies, respectively. (C) The functional expression of hABCG2 in MDCKII/hABCG2, compared to MDCKII/WT cells, as evaluated by bi-directional transport of [<sup>3</sup>H]-prazosin. The apparent permeability coefficients of the compound are shown in apical to basolateral (a-B) and basolateral to apical (b-A) directions. Data are presented as mean  $\pm$  S.D. of triplicate runs.

**Suppression of canine ABCB1 in MDCKII cells unmasks human ABCG2-mediated efflux of olaparib** **JPET#250225**

Yoo-Kyung Song, Ji Eun Park, Yunseok Oh, Sungwoo Hyung, Yoo-Seong Jeong, Min-Soo Kim, Woojin Lee and Suk-Jae Chung : Journal of Pharmacology and Experimental Therapeutics

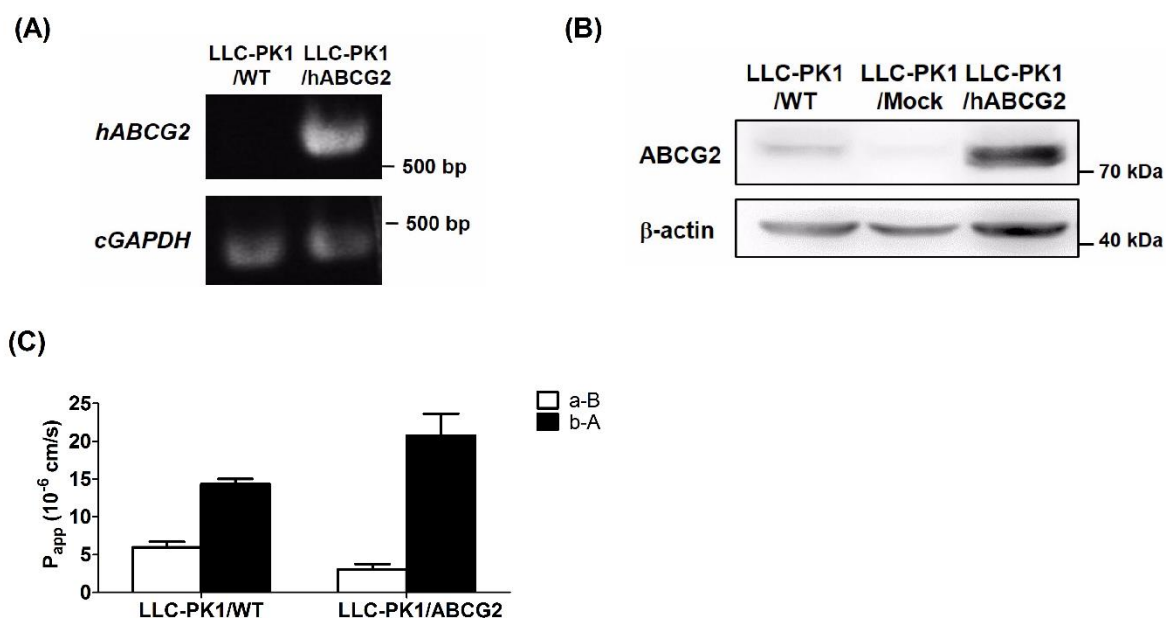

Figure S2. (A) Agarose gel electrophoresis of PCR products using the total RNA extract from LLC-PK1/WT and LLC-PK1/hABCG2 cells. PCR products were generated by *hABCG2* (product size: 577 bp) and *porcine GAPDH* (product size: 396 bp) primer, respectively. (B) Western blot analysis from cell lysates (60  $\mu$ g) of LLC-PK1/WT, LLC-PK1/Mock, and LLC-PK1/hABCG2, probed with anti-ABCG2 and anti- $\beta$ -actin antibodies, respectively. (C) The functional expression of hABCG2 in LLC-PK1/hABCG2, compared to LLC-PK1/WT cells, as evaluated by bi-directional transport of [ $^3$ H]-prazosin. The apparent permeability coefficients of the compound are shown in apical to basolateral (a-B) and basolateral to apical (b-A) directions. Data are presented as mean  $\pm$  S.D. of triplicate runs.

# Suppression of canine ABCB1 in MDCKII cells unmasks human ABCG2-mediated efflux of olaparib

JPET#250225

Yoo-Kyung Song, Ji Eun Park, Yunseok Oh, Sungwoo Hyung, Yoo-Seong Jeong, Min-Soo Kim, Woojin Lee and Suk-Jae Chung : Journal of Pharmacology and Experimental Therapeutics

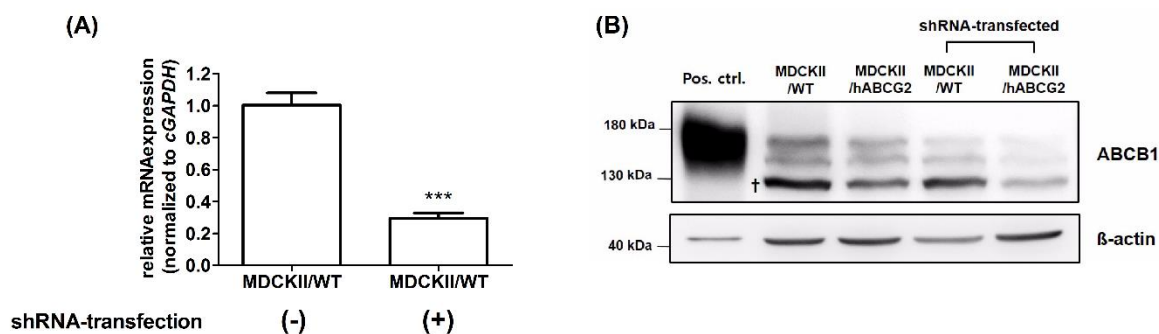

Figure S3. (A) Expression levels of *cABCB1* mRNA in shRNA-transfected and non-transfected MDCKII cell lines were evaluated by qPCR. Data are presented as mean  $\pm$  S.D. of triplicate runs. Asterisks indicate statistical difference from the control (i.e., without transfection) by the unpaired t test (\*\*\*)  $P < 0.005$ . (B) Expression levels of *cABCB1* protein in shRNA-transfected and non-transfected MDCKII cell lines were evaluated by Western blot. The protein amount of sample in the Western blot analysis was 200  $\mu$ g for ABCB1 and 60  $\mu$ g for  $\beta$ -actin. In parallel, 10  $\mu$ g (i.e., for the detection of ABCB1) or 3  $\mu$ g (i.e., for the detection of  $\beta$ -actin) protein was loaded for positive control (i.e., NCI/ADR-RES). Dagger in panel B indicates potential interaction of the antibody with ABCB4 (Schinkel et al., 1991; Scheffer et al., 2000).

**Suppression of canine ABCB1 in MDCKII cells unmasks human ABCG2-mediated efflux of olaparib** **JPET#250225**

Yoo-Kyung Song, Ji Eun Park, Yunseok Oh, Sungwoo Hyung, Yoo-Seong Jeong, Min-Soo Kim, Woojin Lee and Suk-Jae Chung : Journal of Pharmacology and Experimental Therapeutics

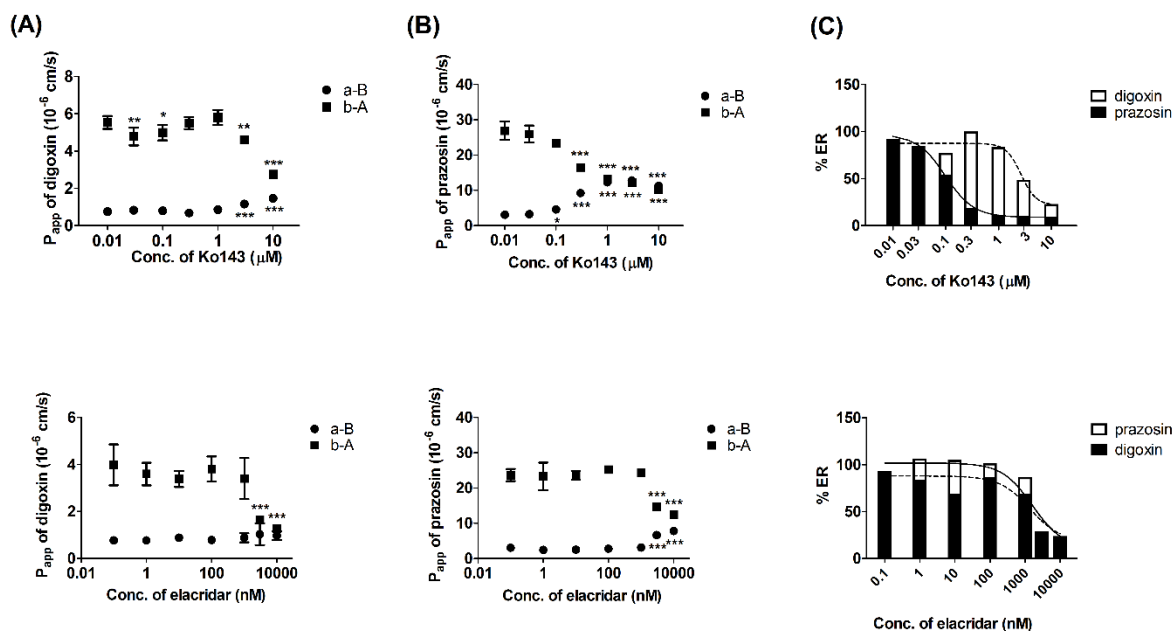

Figure S4. The inhibition profiles of Ko143 in various concentrations against the transport of digoxin in MDCKII/WT cells (A) and prazosin in MDCKII/hABCG2 cells (B) are shown in apical to basolateral (a-B) and basolateral to apical (b-A) direction. The percent of control ER (%ER) was shown together with the best-fit values obtained from the nonlinear regression analysis based on Eq. 1 (C). Similarly, the inhibition profiles of elacridar against the transport of digoxin in MDCKII/WT cells (D) and prazosin in MDCKII/hABCG2 cells (F) are shown together with the %ER values (G). Asterisks indicate statistical differences (\*P < 0.05, \*\*P < 0.01; \*\*\*P < 0.001) from the control group (i.e., without inhibitor) by one-way ANOVA, followed by the Tukey's *post hoc* test. Data are presented as mean ± S.D. of triplicate runs.

Suppression of canine ABCB1 in MDCKII cells unmasks human ABCG2-mediated efflux of olaparib

JPET#250225

Yoo-Kyung Song, Ji Eun Park, Yunseok Oh, Sungwoo Hyung, Yoo-Seong Jeong, Min-Soo Kim, Woojin Lee and Suk-Jae Chung : Journal of Pharmacology and Experimental Therapeutics

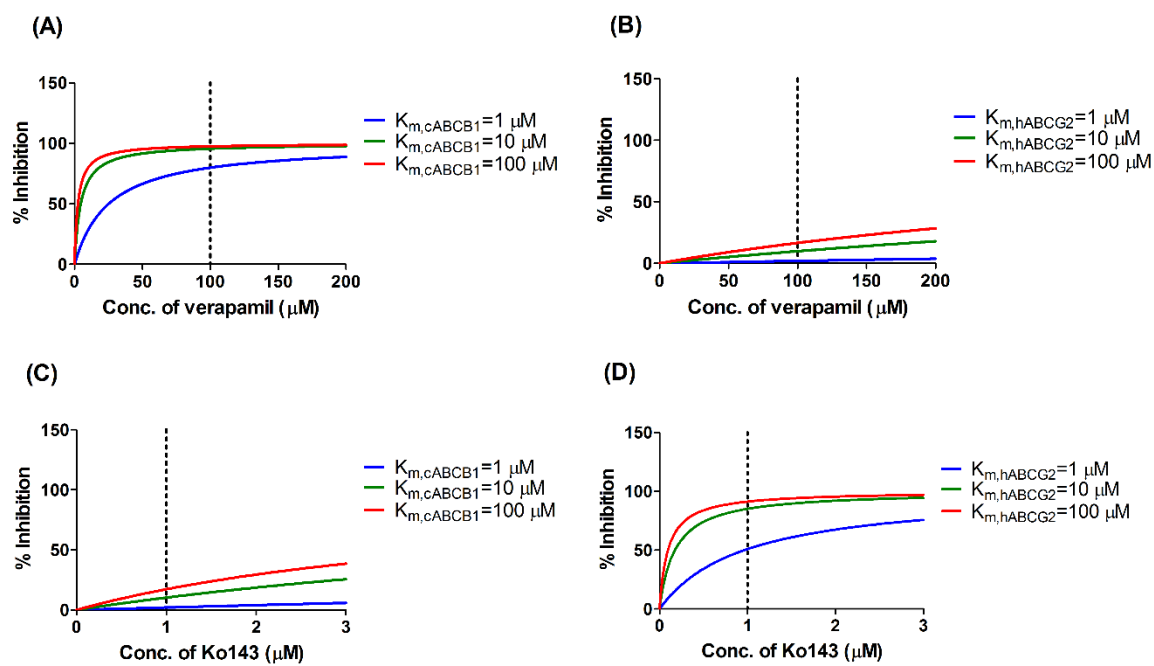

Figure S5. Sensitivity analysis of transport inhibition by 100  $\mu\text{M}$  verapamil towards cABCB1 (A) and hABCG2 (B), and sensitivity analysis of transport inhibition by 1  $\mu\text{M}$  Ko143 towards cABCB1 (C) and hABCG2 (D) assuming arbitrary substrate having a  $K_m$  value of 1~100  $\mu\text{M}$  towards cABCB1 and hABCG2, respectively.

**Suppression of canine ABCB1 in MDCKII cells unmasks human ABCG2-mediated efflux of olaparib** **JPET#250225**

Yoo-Kyung Song, Ji Eun Park, Yunseok Oh, Sungwoo Hyung, Yoo-Seong Jeong, Min-Soo Kim, Woojin Lee and Suk-Jae Chung : Journal of Pharmacology and Experimental Therapeutics

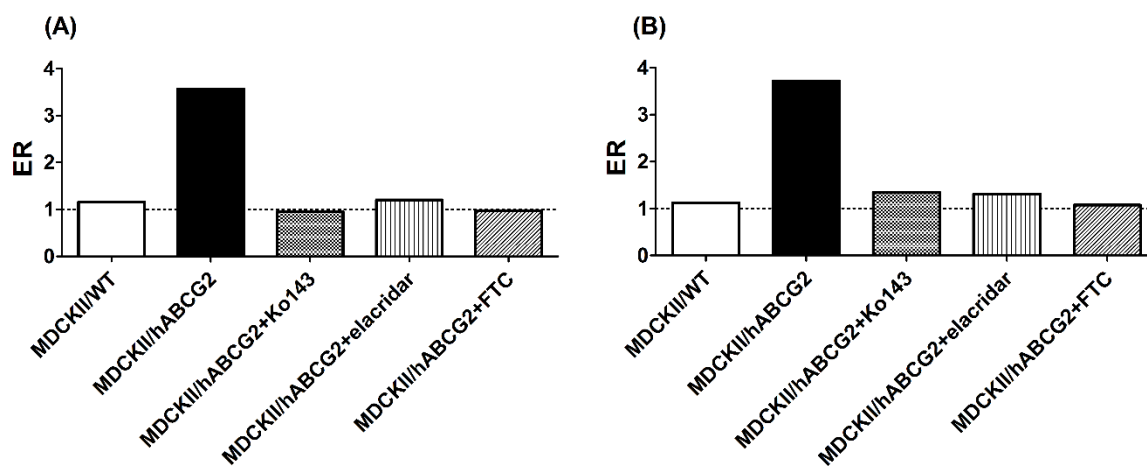

Figure S6. Bi-directional transport of olaparib in the presence of verapamil treatment (A), or in the presence of shRNA-transfected (B) conditions for MDCKII/WT and MDCKII/hABCG2 cells. When necessary, Ko143 (1  $\mu$ M), elacridar (10  $\mu$ M), or fumitremorgin C (FTC; 10  $\mu$ M) was added to the incubation mixture.
